# Supplementary material for: Carbon Emissions and Removals by Forests: New Estimates 1990–2020
Source: Copernicus journal article supplement (doi:10.5194/essd-2020-203), 2020-08-03

# ***Interactive comment on “Carbon Emissions and Removals by Forests: New Estimates 1990–2020” by Francesco N. Tubiello***

**Orjan Jonsson**

orjan.jonsson@fao.org

Received and published: 14 October 2020

A general comment on the terminology for the entire document. The term “deforestation” as used in the document does not fully correspond to  widely recognized FRA definition of deforestation which is a change of land use from forest to another land use. Deforestation as used in this document is the net loss of forest area which includes the combined effect of deforestation and forest expansion.

Also, the term Forest land as used here correspond to  the Forest area (Forest with the FRA definition) at the end of each period and not necessarily exactly to forest land or forest land remaining forest land according to IPCC.

I think a clarification of these two concepts in the beginning would help the further

Printer-friendly version

Discussion paper

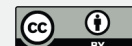

understanding of the document 

---

Interactive comment on Earth Syst. Sci. Data Discuss., <https://doi.org/10.5194/essd-2020-203>, 2020.

**ESSDD**

---

Interactive  
comment

Printer-friendly version

Discussion paper

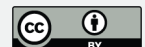

Supplement: Supplementary file [file essd-2020-203-AC1-supplement.zip]
