# Supplementary material for: Carbon Emissions and Removals by Forests: New Estimates 1990–2020
Source: Copernicus journal article supplement (doi:10.5194/essd-2020-203), 2020-08-03

# ***Interactive comment on “Carbon Emissions and Removals by Forests: New Estimates 1990–2020” by Francesco N. Tubiello***

**Orjan Jonsson**

orjan.jonsson@fao.org

Received and published: 14 October 2020

When you look at the forest area change, for a certain period, even if it is a negative net change, it can have two components (deforestation, i.e. change of forest to other land use; and forest expansion i.e. change of other land use to forest. The difference is the net effect of these two change processes, and it is not entirely correct to call the net loss deforestation.

Likewise, countries that have a positive change, still can have deforestation but it is outweighed by the forest expansion.

Further, when area data are not available disaggregated by planted and natural forest, is then the net flux assumed to be due to “deforestation” when total flux is negative and

Printer-friendly version

Discussion paper

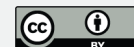

when positive assigned to forest land remaining forest land 

---

Interactive comment on Earth Syst. Sci. Data Discuss., <https://doi.org/10.5194/essd-2020-203>, 2020.

**ESSDD**

---

Interactive  
comment

Printer-friendly version

Discussion paper



Supplement: Supplementary file [file essd-2020-203-AC1-supplement.zip]
