# Supplementary material for: Carbon Emissions and Removals by Forests: New Estimates 1990–2020
Source: Copernicus journal article supplement (doi:10.5194/essd-2020-203), 2020-08-03

# ***Interactive comment on “Carbon Emissions and Removals by Forests: New Estimates 1990–2020” by Francesco N. Tubiello***

**Jenny Wong**

jwong@unfccc.int

Received and published: 29 October 2020

Why were countries divided/categorised into either Annex I or non-Annex I? This categorization denotes the KP. And if it is KP data, then the US is not included? And since 2012, 1-2 other developed countries have stepped out. It may be more helpful to categorize by developed and developing countries to include all Parties to the UNFCCC.

In terms of the figures, for developing countries why has Brazil and Indonesia (despite them being huge forest countries) being highlighted. But according to the data provided in the article, the growing problem lies in Africa. Is it possible to present what is happening in the DRC, if you are only selecting large forest countries.

Printer-friendly version

Discussion paper

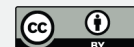

Also, in these figures, you mention “deforestation” but in the y-axis, it refers to  CO2 as emissions.

It is not clear why the 2 categories, naturally regenerating and planted forests were chosen, but how did you compare these to the UNFCCC reported categories. The selected categories would apply to the KP, article 3.3 and 3.4. But developing countries do not report on these Articles. Under the Convention, countries report on forest lands remaining forest lands (could be natural forests) or forest lands converted to other land uses or other land uses converted to forests (planted forest), following IPCC LU categorization.

---

Interactive comment on Earth Syst. Sci. Data Discuss., <https://doi.org/10.5194/essd-2020-203>, 2020.

Printer-friendly version

Discussion paper



Supplement: Supplementary file [file essd-2020-203-AC1-supplement.zip]
